# Supplementary material
Source: Springer Nature journal article supplement (https://www.springermedizin.de/resource/supplementary/12885_2010_2136_MOESM7_ESM.pdf/9460602)
Supplement: MOESM7 [file 9460602]

Titles and abstracts retrieved from electronic and bibliographic searches (n =3,480)

Articles excluded unlikely to be relevant based on title and abstract (n = 3,203)

Potentially relevant articles retrieved for further consideration (n = 277)  
Articles identified from reference lists (n = 15)

Excluded articles not meeting one or more of inclusion criteria (n = 237)

Articles meeting eligibility criteria (n = 55)
